# Supplementary material for: Synthesis of Sulfur-Doped Magnetic Iron Oxides for Efficient Removal of Lead from Aqueous Solutions
Source: MDPI journal article supplement (doi:10.3390/w15203667), 2023-10-20
Supplement: s1 [file s1]

# Synthesis of Sulfur-doped magnetic iron oxides for efficient removal of Pb from aqueous solutions

Junqing Xu <sup>1‡</sup>, Meitian Pan <sup>1‡</sup>, Cong Zou<sup>2</sup>, Xueqiong Huang<sup>2</sup>, Takeshi Hagio<sup>3</sup>, Ryoichi Ichino<sup>3</sup>, Long Kong<sup>2\*</sup>, Liang Li<sup>2</sup>

<sup>1</sup> China-UK Low Carbon College, Shanghai Jiao Tong University, Shanghai 201306, China

<sup>2</sup> School of Environment Science and Engineering, Shanghai Jiao Tong University, Shanghai 200240, China

<sup>3</sup> Institutes of Innovation for Future Society, Nagoya University, Nagoya 464-8603, Japan

\* Correspondence: longmao88@sjtu.edu.com; Tel.: +86-54747567

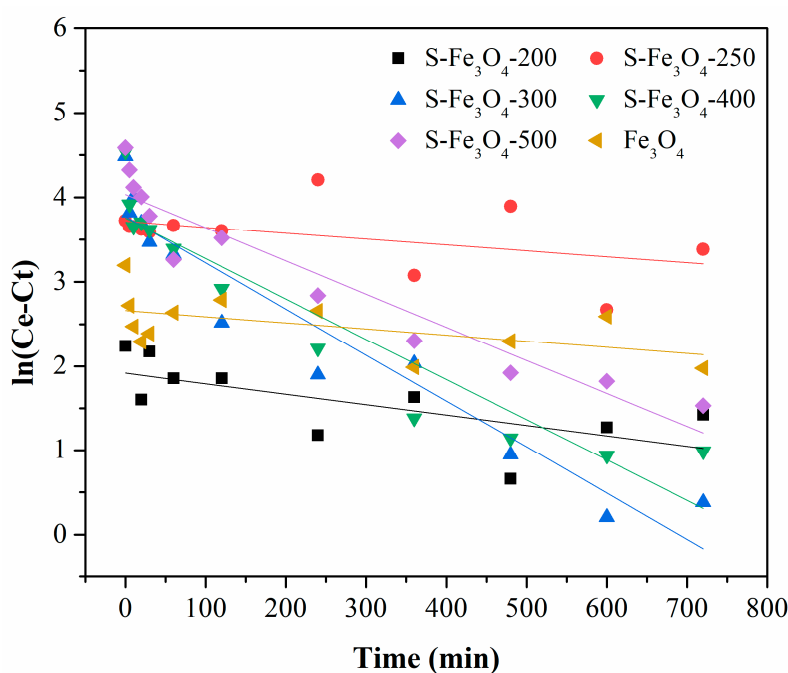

**Fig S1** Test of pseudo-first-order model for adsorption of Pb (II) on different adsorbents. The symbols are experimental data and the solid lines represent the fitted curves.

Table S1 Adsorption kinetics parameters for pseudo-first-order and pseudo-second-order model of Pb (II) adsorption.

| Adsorbents                            | $q_{e,exp}$<br>(mg/g) | pseudo-first-order            |                     |        | pseudo-second-order                               |                     |        |
|---------------------------------------|-----------------------|-------------------------------|---------------------|--------|---------------------------------------------------|---------------------|--------|
|                                       |                       | $k_1$<br>(min <sup>-1</sup> ) | $q_{e,1}$<br>(mg/g) | $R^2$  | $K_2$<br>(g·mg <sup>-1</sup> ·min <sup>-1</sup> ) | $q_{e,2}$<br>(mg/g) | $R^2$  |
| S-Fe <sub>3</sub> O <sub>4</sub> -200 | 9.40                  | $1.24 \times 10^{-3}$         | 6.80                | 0.3963 | $7.29 \times 10^{-4}$                             | 8.77                | 0.8184 |
| S-Fe <sub>3</sub> O <sub>4</sub> -250 | 41.58                 | $6.97 \times 10^{-4}$         | 41.11               | 0.1369 | $4.27 \times 10^{-5}$                             | 52.63               | 0.5205 |
| S-Fe <sub>3</sub> O <sub>4</sub> -300 | 88.71                 | $5.47 \times 10^{-3}$         | 43.43               | 0.9173 | $6.43 \times 10^{-4}$                             | 90.91               | 0.9995 |
| S-Fe <sub>3</sub> O <sub>4</sub> -400 | 93.98                 | $4.78 \times 10^{-3}$         | 42.76               | 0.8893 | $6.09 \times 10^{-4}$                             | 90.91               | 0.9994 |
| S-Fe <sub>3</sub> O <sub>4</sub> -500 | 98.27                 | $3.93 \times 10^{-3}$         | 56.56               | 0.9051 | $3.31 \times 10^{-4}$                             | 100.00              | 0.9979 |
| Fe <sub>3</sub> O <sub>4</sub> -300   | 24.45                 | $7.24 \times 10^{-4}$         | 14.31               | 0.2255 | $4.10 \times 10^{-4}$                             | 21.74               | 0.8285 |

Table S2 Weight Percentage of major elements of S-Fe<sub>3</sub>O<sub>4</sub> synthesized with different S/Fe molar ratio from XRF analysis

| Sample                                | O/%   | Fe/%  | S/%  | Others/% | S content in<br>Fe <sub>3</sub> O <sub>4</sub> ( wt%) |
|---------------------------------------|-------|-------|------|----------|-------------------------------------------------------|
| Fe <sub>3</sub> O <sub>4</sub> :S-0.5 | 47.31 | 51.25 | 0.83 | 0.61     | 61.74                                                 |
| Fe <sub>3</sub> O <sub>4</sub> :S-1   | 43.92 | 54.89 | 1.10 | 0.09     | 49.90                                                 |
| Fe <sub>3</sub> O <sub>4</sub> :S-2   | 49.03 | 49.94 | 0.85 | 0.21     | 58.75                                                 |
| Fe <sub>3</sub> O <sub>4</sub> :S-3   | 49.15 | 48.91 | 1.86 | 0.08     | 26.30                                                 |
| Fe <sub>3</sub> O <sub>4</sub> :S-4   | 47.67 | 48.31 | 3.93 | 0.09     | 12.29                                                 |
| Fe <sub>3</sub> O <sub>4</sub> :S-5   | 43.05 | 51.61 | 5.22 | 0.12     | 9.89                                                  |
